# 1 **Maternal Factors Promoting Normal Linear Growth of Children from Impoverished** 2 **Rwandan Households.**

3 Jean de Dieu Habimana<sup>1\*</sup>, Korukire Noel<sup>1</sup>, Sara Jewett<sup>2</sup>, Eric Matsiko<sup>1</sup>, Maryse Umugwaneza<sup>1</sup>,  
4 Lawrence Rugema<sup>1</sup>, and Cyprien Munyanshongore<sup>1</sup>

5  
6 <sup>1</sup> School of Public Health, College of Medicine and Health Sciences, University of Rwanda,  
7 P.O. Box 3286, Kigali, Rwanda.

8 <sup>2</sup> School of Public Health, Faculty of Health Sciences, University of the Witwatersrand,  
9 Johannesburg 2193, South Africa.

10 **\*Corresponding author:** Jean de Dieu Habimana, School of Public Health, College of  
11 Medicine and Health Sciences, University of Rwanda, P.O. Box 3286 Kigali, Rwanda, e-mail:  
12 [jhabimana@cartafrica.org](mailto:jhabimana@cartafrica.org).

## 13 **Abstract:**

14 **Background:** Linear growth faltering continues to be a pervasive public health concern,  
15 considering its persistent prevalence and repercussions. This study aimed to investigate potential  
16 maternal factors promoting normal linear growth among children from impoverished Rwandan  
17 households.

18 **Methods:** A structured questionnaire was used to collect data from 807 mother-child dyads selected  
19 using a multi-stage cluster sampling procedure. The main outcome variable was height-for-age Z-  
20 scores. The main predictors were the mother has income-generating activity, maternal education,  
21 maternal depression, household decision-making (HHDM), number of ANC visits, use of family  
22 planning method, family planning types, and mode of delivery. The potential confounding variables  
23 were child age, both parents working, good handwashing practice, owning a vegetable garden, and  
24 the total number of livestock. Univariate analysis was used to establish means, frequencies, and  
25 percentages; the Kruskal-Wallis, Mann-Whitney U, and Spearman Rank Correlation tests were  
26 used for bivariate analysis and robust linear regression for multivariable analysis.

27 **Results:** Maternal factors promoting normal linear growth of children were the presence of the  
28 mother's income-generating activity ( $\beta=0.640$  [0.0269–1.253], p-value=0.041), mother's  
29 involvement in household decision-making ( $\beta=0.147$  [0.080– 0.214], p-value<0.001), and higher  
30 frequency of ANC consultations ( $\beta=0.189$  [0.025– 0.354], p-value=0.024). Additionally, a  
31 combination of household decision-making with ANC visit numbers predicted an increase in child  
32 linear growth ( $\beta=0.032$  [0.019– 0.045], p-value<0.001).

33 **Conclusion:** Maternal factors such as maternal income-generating activity, maternal involvement  
34 in household decision-making, and increased number of ANC visits were found to promote normal  
35 child linear growth and can provide valuable information for shaping interventions and policies  
36 aimed at promoting child growth in the Rwandan community.

37

## 38 **Background**

39 Linear growth faltering continues to be a pervasive public health issue that affects many  
40 children worldwide. In 2022, linear growth faltering affected approximately 148.1 million  
41 children globally, which amounts to 22.3% of all children under five years of age [1]. Sub-  
42 Saharan Africa was among the most affected, with 31.3%, thereby constituting a noteworthy  
43 concern [2]. Rwanda is among the countries with an alarming rate of linear growth faltering,  
44 with approximately 33.1% of children under five years affected in 2020 [3]. Thus, linear growth  
45 faltering continues to be a substantial health issue that requires further attention in Rwanda.

46 Linear growth faltering is the finest indicator of the accumulated effect of long-term  
47 undernutrition during the 1000 days of life [4]. It is explained as height-for-age Z-scores that  
48 fall below minus two standard deviations of the median height of World Health Organisation  
49 growth standards [5]. Linear growth faltering is not only an indicator of poor nutrition but also  
50 has short and long-term consequences such as reduced physical development, cognitive  
51 impairment and elevated proneness to infections [4], cardiovascular diseases [6], poor  
52 academic achievement, reduced physical resilience, and diminished economic productivity [7].

53 The negative outcomes of linear growth faltering can be notably devastating and cause  
54 irreversible damage, given that the first 1,000 days of life are a critical period of the child's  
55 development [8]. In addition to that, linear growth faltering can also contribute to social and  
56 economic inequalities, perpetuating a cycle of poverty and malnutrition [9]. Short stature  
57 among mothers also increases the risks of having stunted children and spreads the vicious cycle  
58 of intergenerational linear growth faltering [10].

59 Effective strategies to promote normal linear growth include promoting maternal and child  
60 care, encouraging optimal feeding practices, providing early childhood education and  
61 stimulation, empowering women, promoting maternal psychosocial factors, and ensuring  
62 access to safe water and improved sanitation [11]. Addressing linear growth faltering also  
63 requires a multisectoral approach that includes collaboration of different sectors, including  
64 health, education, water and sanitation, and social protection [12]. With coordinated efforts, it  
65 is possible to promote normal linear growth and improve the overall health of millions of  
66 children worldwide.

67 The initiatives taken by Rwanda's government and its stakeholders to contribute to the  
68 promotion of linear growth are evident. The prevalence of linear growth faltering among  
69 children has decreased from 44.2% in 2010 [13] to 33.1 in 2020 [3]. However, this decrease is  
70 still far from achieving the target of at least 19% by 2024, as proposed by the fourth health  
71 sector strategic plan for Rwanda [14]. This slight decrease testifies to the possibility of normal  
72 linear growth in some families. Thus, there is a need to explore other factors that could be  
73 associated with normal linear growth. The aim of this study was, therefore, to investigate  
74 potential maternal factors contributing to normal linear growth among children from  
75 impoverished Rwandan households.

## 76 **Methods**

### 77 **Study setting, design, and population.**

78 This study was carried out in the districts of Kayonza, Nyaruguru, Burera, Rutsiro, and Gasabo  
79 from the provinces of eastern, southern, northern, western, and the City of Kigali, respectively.  
80 These districts were purposively selected due to their elevated prevalence of stunting.

81 This study used a cross-sectional design and a quantitative approach. We included children  
82 aged six to twenty-three months and their mothers who lived in the study districts. Inclusion  
83 criteria considered the child coming from a low-income family (category 1&2 of Ubudehe)  
84 [15], being a singleton, and being born full-term. Eligible participants who appeared to be too  
85 sick to participate were not considered to take part in the study.

86 The sample size of 807 participants was calculated using Fischer formula ( $n = \frac{Z^2pq}{d^2}$ ) [16],  
87 considering a design effect of 2, a 20% loss to follow-up, and a precision level of 5%. In this  
88 formula, n indicates the sample size, and Z represents the abscissa of the normal distribution at  
89 a confidence level of 95% (Z=1.96), with the prevalence p of (33.1%), the complement of p, q  
90 = (1-p), and the desired accuracy of 5%.

91 We used a three-stage cluster sampling technique, where administrative villages served as the  
92 primary sampling unit, and households served as the unit of analysis. Extensive lists of all  
93 eligible candidates (mothers and children ages 6-23) who met the inclusion criteria were  
94 created from each chosen village in partnership with community health workers. After lists  
95 became available, systematic random sampling was used to select 807 mother-child dyads.

96 Qualified and experienced enumerators were recruited and trained for three days: one day for  
97 theory, one day for practice, comprising the pretest, and one day reserved for the adjustment of  
98 the data collection tool. Community health workers from the visited villages helped us to  
99 identify eligible households. Twenty homes in one sector of the Gasabo district participated in  
100 a pretest; the results were used to update and correct the data collection instruments. We chose  
101 one sector within the Gasabo district due to the same attributes as the research area. However,  
102 the study did not cover this sector.

103 Data was collected from 30<sup>th</sup> August to 23<sup>rd</sup> September 2021 by twenty-five enumerators  
104 grouped into five teams. Each team was composed of six enumerators and one supervisor.  
105 Enumerators worked in pairs to help each other during the data collection. One team composed  
106 of three pairs was assigned to collect data in one District and coordinated with one supervisor.  
107 Data collection was conducted in the participants' households. In order to avoid data entry  
108 errors and save time for data entry, quantitative data were gathered using a data collection tool  
109 installed in tablets with an electronic data management system called Kobo Collect.

110 A portable stadiometer was used to measure the child's length. The remaining data were  
111 gathered through a structured questionnaire. All day-to-day collected data were sent to the  
112 central system, where quality checks were done daily to ensure completeness of data. The  
113 primary investigator and the supervisors oversaw every aspect of the data-gathering process.

#### 114 **Study variables.**

115 The main outcome variable of this study was linear growth, and it was presented in the form of  
116 height-for-age Z-scores as a continuous variable. The main predictors of this study were the  
117 mother having income-generating activity, maternal education, maternal depression, household  
118 decision-making (HHDM), number of ANC visits, use of family planning method, family  
119 planning types, and mode of delivery. The potential confounding variables were child age,  
120 engagement in works for both parents, good handwashing practice, lack of vegetable gardens,  
121 and the total number of livestock (inclusive of chicken, goats, and cattle).

122 To assess maternal depression, we used the EPDS, a ten-item tool with a 0-3 Likert scale and  
123 a maximum score of 30 [17]. When it comes to interpretation, the higher the value, the worse  
124 the depressive symptoms. The EPDS tool has been widely used throughout sub-Saharan Africa  
125 [18]. In addition, it has been validated for examining the extent and potential risks of depression

126 during the perinatal period in numerous countries and languages [18]. It has also been verified  
127 as an antenatal depression screening tool in a previous Rwandan study [19]. In the present  
128 study, the EPDS was shown to be reliable, with Cronbach's alpha value was 0.840.

129 For household decision-making, we used a three-item scale to measure the women's household  
130 decision-making, with the total score ranging between zero and nine [20]. For interpretation, a  
131 higher score reflects more maternal involvement in decision-making. For this study, the tool  
132 was deemed reliable, attaining a Cronbach's Alpha value of 0.895.

### 133 **Data analysis**

134 Data were analyzed using STATA 15 software. In order to export the data into stata for final  
135 cleaning and analysis, a data dictionary was developed. After data cleaning, the Shapiro-Wilk  
136 Test was used to check for the normality of the dependent variable. Initially, descriptive  
137 analysis helped to summarize study variables using frequencies and percentages or means and  
138 standard deviations.

139 The next level involved specifying significant variables considering the main outcome variable.  
140 Given that the outcome variable was not normally distributed, we opted to use the Kruskal-  
141 Wallis, Mann-Whitney U, and Spearman Rank Correlation tests for bivariate analysis and Huber's  
142 approach for robust linear regression for multivariable analysis. This approach allows for  
143 vigorous estimation of the model coefficients, accommodating potential outliers and providing  
144 reliable findings in the presence of diverse variable types [21]. Only significant variables from  
145 bivariate analysis ( $p\text{-value} \leq 0.10$ ) were included in the robust regression analysis.

146 The robust regression analysis models were fitted in three steps. In the first step (Model I),  
147 significant variables with  $p\text{-value} \leq 0.10$  from the bivariate analysis were entered one by one.  
148 In the second step (Model II), the significant variables ( $p\text{-value} \leq 0.05$ ) related to maternal

149 factors were entered one by one into the Model after controlling for other significant factors  
150 from Model I, including child age, good and washing practice, and the number of livestock. In  
151 the third stage (Model III), we entered all significant variables from Model II with  $p \leq 0.05$  after  
152 controlling the same variables as in Model II. Only significant variables were considered  
153 independent factors of normal linear growth. The results were reported as a beta coefficient  
154 ( $\beta$ ) with a 95% confidence interval (CI) and  $p$ -value  $\leq 0.05$ . In addition, after finding  
155 independently significant variables, we thoroughly analyzed their combined effects. To be  
156 more precise, we created two separate models to look into the relationship between a  
157 combination of household decision-making and ANC visit numbers, a combination of  
158 household decision-making and the mother having income-generating activity, a combination  
159 of the numbers of ANC visits and the mother having income-generating activity, as well as the  
160 interaction of all three variables together. The process used to construct these interaction  
161 models followed the same exacting guidelines as our earlier analysis.

## 162 **Ethical considerations**

163 The Ethical approval was issued by the Institutional Review Board of the College of Medicine  
164 and Health Sciences, University of Rwanda (N<sup>o</sup>. 335/CMHS IRB 2021, which amended N<sup>o</sup>.  
165 178/CMHS IRB 2022). Additionally, a research permit was obtained from the Rwanda  
166 Ministry of Local Governance and the National Institute of Statistics of Rwanda. In addition,  
167 the mothers signed their written consent to participate voluntarily.

## 168 **Results**

### 169 **Linear growth among children**

170 Height-for-age Z-scores, reflecting linear growth for the sample, exhibit a mean of  $-1.38 \pm 1.78$ .  
171 As shown in Figure 1, curve A represents a normal distribution, while curve B reflects the study

172 sample's growth curve. Besides, curve B demonstrates a left-skewed tendency with a  
173 concentration of children aged 6-23 months from impoverished Rwandan households reflecting  
174 relatively lower height-for-age Z-scores. This negative value suggests a tendency towards  
175 linear growth faltering. However, even though the present mean displays a negative skew, a  
176 large number of children still fell within the normal range (above minus two standard  
177 deviations), indicating that a significant number of children had a likelihood of improving their  
178 height-for-age Z-scores despite the unhurried improvement.

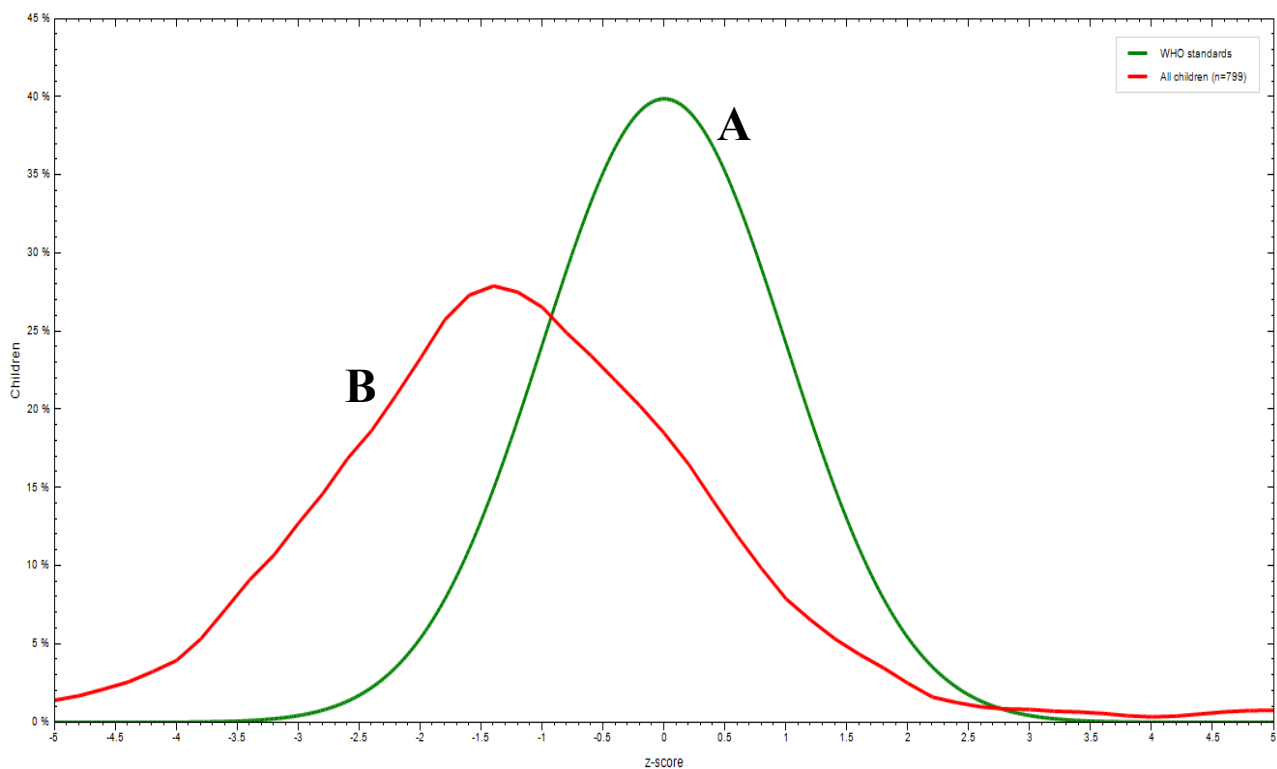

179 Figure 1. Height-for-age Z-scores (linear growth)

### 180 Sociodemographic characteristics of study participants.

181 As detailed in Table 1, of the mothers who completed the survey, the mean EPDS score was  
182  $10.84 \pm 5.91$  out of a maximum of 30. This mean demonstrates a moderate level of depressive  
183 syndromes within the study population. Furthermore, the mean HHDM score was  $7.44 \pm 2.09$



184 out of a maximum of 10. The mean here shows a relatively high level of involvement of the  
185 mothers in household decision-making among the study population.

186 In relation to socioeconomic status, the mean livestock owned by households was 1.48  
187 domestic animals. Only 7.7% of mothers said they had income-generating activities, with even  
188 fewer 3.7%) claiming to be only the ones who work in the household, and 11.03% did not  
189 receive formal education.

190 In terms of reproductive health, around half of all women (49.7%) did not use contraceptive  
191 methods before getting pregnant. The mean number of ANC visits was  $3.50 \pm 0.863$ , while  
192 Rwanda recommends at least 4 ANC visits. Further, most mothers gave birth in a health facility,  
193 with only 1.9% reporting giving birth outside a health facility. Post-delivery, 13.8% of mothers  
194 claimed to experience breast discomfort during lactation. In addition, about half of all surveyed  
195 households (51.1%) had a vegetable garden, while 74.1% demonstrated good handwashing  
196 practices, and 86.3% reported having both parents working.

197 Using the same table, we examined the relationship between the sociodemographic  
198 characteristics of mothers and the normal linear growth of children. The following variables  
199 were significant ( $p$ -value  $< 0.05$ ): child age ( $p$ -value $<0.001$ ), maternal education ( $p$ -value=  
200 0.005), EPDS ( $p$ -value=0.004) and HHDM ( $p$ -value $<0.001$ ), ANC visits numbers ( $p$ -  
201 value=0.001), the mother has income-generating activities ( $p$ -value $<0.001$ ), the mother works  
202 alone ( $p$ -value= 0.019), experience breast discomfort during lactation ( $p$ -value= 0.037), mode  
203 of delivery ( $p$ -value= 0.004), the total number of livestock ( $p$ -value=0.024), and good  
204 handwashing practice( $p$ -value $<0.001$ ).

205

206

207 **Table 1: Sociodemographic characteristics of study participants (N=807).**  
208

| Variables                                | Mean± SD    | Frequency | Per cent | Bivariate analysis |                |
|------------------------------------------|-------------|-----------|----------|--------------------|----------------|
|                                          |             |           |          | $\rho$ / U/H       | p-value        |
| Child age                                | 14.171±5.13 | -         | -        | -0.193             | < <b>0.001</b> |
| EPDS                                     | 10.84 ±5.91 | -         | -        | -0.101             | <b>0.004</b>   |
| Household decision-making scores         | 7.44 ±2.089 | -         | -        | 0.217              | < <b>0.001</b> |
| ANC visits numbers                       | 3.51 ±0.855 | -         | -        | 0.113              | <b>0.001</b>   |
| Maternal education                       |             |           |          |                    |                |
| No formal education                      | -           | 89        | 11.03    | 10.714             | <b>0.005</b>   |
| Primary                                  | -           | 505       | 62.58    |                    |                |
| Post-primary                             | -           | 213       | 26.39    |                    |                |
| Mother has income-generating activities. |             |           |          |                    |                |
| No                                       | -           | 745       | 92.3     | -2.008             | <b>0.045</b>   |
| Yes                                      | -           | 62        | 7.7      |                    |                |
| Mother works alone                       |             |           |          |                    |                |
| No                                       | -           | 30        | 96.3     | -2.351             | <b>0.019</b>   |
| Yes                                      | -           | 777       | 3.7      |                    |                |
| Use of family planning method            |             |           |          |                    |                |
| No                                       | -           | 401       | 49.7     | 0.708              | 0.479          |
| Yes                                      | -           | 406       | 50.3     |                    |                |
| Breast discomfort during lactation       |             |           |          |                    |                |
| No                                       | -           | 696       | 86.2     | 2.085              | <b>0.037</b>   |
| Yes                                      | -           | 111       | 13.8     |                    |                |
| Family planning types                    |             |           |          |                    |                |
| No family planning before                | -           | 402       | 49.8     | 1.508              | 0.470          |
| Modern                                   | -           | 381       | 47.2     |                    |                |
| Traditional                              | -           | 24        | 3.0      |                    |                |
| Delivery mode                            |             |           |          |                    |                |
| Not assisted by health facility          | -           | 15        | 1.9      | 11.24              | <b>0.004</b>   |
| Vaginal delivery from a health           | -           | 703       | 87.1     |                    |                |
| Cesarean                                 | -           | 89        | 11.0     |                    |                |
| Total number of livestock                | 1.48 ±2.414 | -         | -        | 0.080              | <b>0.024</b>   |
| Vegetable garden possession              |             |           |          |                    |                |
| No                                       | -           | 395       | 48.9     | 1.572              | 0.116          |
| Yes                                      | -           | 412       | 51.1     |                    |                |
| Good handwashing practice                |             |           |          |                    |                |
| No                                       | -           | 160       | 25.9     | -6.097             | < <b>0.001</b> |
| Yes                                      | -           | 458       | 74.1     |                    |                |
| Both parent working                      |             |           |          |                    |                |
| No                                       | -           | 111       | 13.7     | 0.175              | 0.861          |
| Yes                                      | -           | 696       | 86.3     |                    |                |

\*  $\rho$  is the coefficient for Spearman rank correlation, U for the Mann-Whitney U test, and H for the Kruskal-Wallis test.

209           **Multivariable analysis: maternal factors promoting a normal linear growth of**  
210           **children.**

211 Table 2 shows the results of multivariable analysis into three models, with the final model  
212 results presented here. The results suggest that maternal engagement in income generation,  
213 higher scores of maternal involvement in household decision-making, and more ANC visits are  
214 all positively associated with higher height-for-age Z-scores. To be more specific, the mother's  
215 being engaged in income-generating activities increased by 0.640 to the Z-scores of height-for-  
216 age of the child ( $\beta=0.640$  [0.0269–1.253], p-value= 0.041). In addition, with an increase in  
217 one unit of household decision-making, there is an increase of 0.147 in Z-scores of height-for-  
218 age of the child ( $\beta=0.147$  [0.080– 0.214], p-value< 0.001). Further, in line with the increase  
219 in one antenatal care visit for the woman, there is an additional 0.189 units to the Z-score of  
220 height-for-age ( $\beta=0.189$  [0.025– 0.354], p-value= 0.024).

221 Table 3 presents the combined effects of all significant variables. The findings showed that a  
222 combination of HHDM and ANC visits was significant ( $\beta=0.032$  [0.019– 0.045], p-  
223 value<0.001). This coefficient means that for each unit increase in the combination of  
224 household decision-making scores and number of ANC visits, a corresponding increase of  
225 0.032 units in linear growth was anticipated.

226 **Table 2: Multivariable analysis: factors promoting normal linear growth of children (N=807).**

227

| Variables                             | Model 1                  |                  | Model 2                |                  | Model 3               |                  |
|---------------------------------------|--------------------------|------------------|------------------------|------------------|-----------------------|------------------|
|                                       | □ [CI]                   | p-value          | □ [CI]                 | p-value          | □ [CI]                | p-value          |
| Child age                             | -0.062 [-0.086 – -0.039] | <b>&lt;0.001</b> | -                      | -                | -                     | -                |
| Maternal education                    | 0.288 [0.087– 0.489]     | <b>0.005</b>     | 0.165 [-0.080 – 0.411] | 0.186            | -                     | -                |
| Mother has income-generating activity | 0.476 [-0.084– 1.036]    | <b>0.095</b>     | 0.627 [0.009 –1.246]   | <b>0.047</b>     | 0.640 [0.0269–1.253]  | <b>0.041</b>     |
| Edinburgh post-natal depression scale | -0.025 [-0.046– -0.036]  | <b>0.002</b>     | -0.016 [-0.042– 0.008] | 0.188            | -                     | -                |
| Household decision-making scores      | 0.147 [0.090– 0.204]     | <b>&lt;0.001</b> | 0.160 [0.094– 0.226]   | <b>&lt;0.001</b> | 0.147 [0.080– 0.214]  | <b>&lt;0.001</b> |
| ANC visits                            | 0.248 [0.102 – 0.395]    | <b>0.001</b>     | 0.224 [0.059 – 0.389]  | <b>0.008</b>     | 0.189 [0.025 – 0.354] | <b>0.024</b>     |
| Total number of livestock             | 0.063 [0.020– 0.107]     | <b>0.004</b>     | -                      | -                | -                     | -                |
| Mother working alone                  | -0.443 [-1.087– 0.201]   | 0.177            | -                      | -                | -                     | -                |
| Breast discomfort during lactation    | -0.170 [-0.571– 0.229]   | 0.404            | -                      | -                | -                     | -                |
| Mode of delivery                      | 0.220 [-0.077– 0.518]    | <b>0.146</b>     | -                      | -                | -                     | -                |
| Good handwashing practice             | 0.924 [0.587– 1.261]     | <b>&lt;0.001</b> | -                      | -                | -                     | -                |

**Model I:** significant variables from the bivariate analysis were entered one by one.

**Model II:** only significant maternal factors from Model I were entered one by one after controlling other significant from Model I.

**Model III:** all significant maternal factors from Model II, after controlling other significant from Model I.

228

229

230

231 **Table 3: Combined effect between significant variables that promote linear growth (N=807).**

232

| Variables                                                                             | Model 1                |                  | Model 2                       |                  | Model 3                |                  |
|---------------------------------------------------------------------------------------|------------------------|------------------|-------------------------------|------------------|------------------------|------------------|
|                                                                                       | □ [CI]                 | p-value          | □ [CI]                        | p-value          | □ [CI]                 | p-value          |
| Household decision-making and number of ANC visits                                    | 0.031 [0.020– 0.042]   | <b>&lt;0.001</b> | 0.031 [ <b>0.018– 0.044</b> ] | <b>&lt;0.001</b> | 0.032 [0.019– 0.045]   | <b>&lt;0.001</b> |
| Household decision-making and the mother has income-generating activity               | 0.071 [0.001– 0.1419]  | <b>0.048</b>     | 0.084 [0.004– 0.164]          | <b>0.039</b>     | 0.117 [-0.203– 0.438]  | 0.473            |
| Number of ANC visits, and the mother has income-generating activity                   | 0.140 [-0.023 – 0.304] | <b>0.093</b>     | 0.206 [0.017– 0.396]          | <b>0.033</b>     | 0.410 [-0.567 – 1.387] | 0.410            |
| Household decision-making, number of ANC visits, and the mother has income-generating | 0.019 [-0.001– 0.039]  | <b>0.056</b>     | 0.025 [0.001 – 0.049]         | <b>0.043</b>     | -0.060[-0.219 –0.098]  | 0.456            |

**Model I:** combined significant variables from multivariable analysis were entered one by one.

**Model II:** combined significant factors from Model I were entered one by one after controlling the same factors.

**Model III:** all significant maternal factors from Model II were entered one by one after controlling the same factors.

233

## 234 Discussion

235 Linear growth as expressed by height-for-age Z-scores for children in this study was, on  
236 average  $-1.38 \pm 1.78$ . Compared to the expected average for their age group, this mean is  
237 relatively lower. The fact that the study sample was, on average, shorter than the reference  
238 population may raise concerns about the trend of linear growth faltering among children from  
239 poor Rwandan households. This trend is supported by numerous studies that have been  
240 conducted previously [22,23]. On a more optimistic note, despite this negative tendency, there  
241 was still a large number of children that fell in the normal range of linear growth since the mean  
242 did not fall under minus two. The present mean aligns with a study that indicates the possibility  
243 of normal linear growth despite belonging to low socioeconomic families [24].

244 The present study explored maternal factors that could promote child linear growth. The mean  
245 of  $10.84 \pm 5.91$  for the EPDS score indicates an elevated level of depressive syndromes within  
246 the studied population. These findings are consistent with other studies conducted in Rwanda,  
247 which showed a high prevalence of antenatal depressive symptoms [18,25]. Despite the  
248 elevated prevalence of maternal depressive symptoms, we did not find any statistically  
249 significant associations with childhood linear growth.

250 Unlike maternal depression, this study did find a positive association between household  
251 decision-making and linear growth. The mean HHDM) scores of  $7.44 \pm 2.089$  suggest that  
252 mothers in the study population felt relatively empowered in relation to household decision-  
253 making. This empowerment implies that an empowered decision-making process within  
254 households may contribute positively to the linear growth of children[26]. Our study findings  
255 were consistent with studies conducted in Ethiopia [27,28] and Nigeria [29], where poor  
256 maternal implication in household decision-making decreased height-for-age Z-scores for  
257 children.

258 The results of this study revealed a substantial positive correlation between the number of ANC  
259 visits for women and the linear growth of the children. This association could be justified by  
260 the fact that the parents who regularly attended ANC received health and nutrition education.  
261 In addition, ANC was a window for them to be enrolled in other programs set by the  
262 government that target improving their lives. Unfortunately, this was not explored. However,  
263 another study conducted in Sub-Saharan Africa has also found this association [24] and points  
264 to the potential role of maternal healthcare utilization during pregnancy in promoting child  
265 growth.

266 Mothers being engaged in income-generating activities increased the height-for-age Z-scores  
267 of the child in this study. This relationship may be due to improved access to socioeconomic  
268 resources that contribute to the optimization of purchase power, better food, healthcare, and  
269 living conditions. Another study conducted in Cambodia found that increased income can  
270 improve a child's access to healthcare and better nutrition [30]. Another study from Bangladesh  
271 established a positive relationship between maternal employment and the overall economic  
272 well-being of the family with long-term favourable benefits on the child's development [31].  
273 That being said, some studies have found the opposite when a mother is involved in any activity  
274 that can generate income [32,33]. The reason behind this could be the reduced time to allocate  
275 to children and hence reduced child care [34].

276 From this analysis, we explored the combined effects of both household decision-making  
277 scores and the number of antenatal care (ANC) visits on linear growth. This positive association  
278 suggests that the effect of maternal involvement in household decision-making on child linear  
279 growth is more pronounced in the presence of higher levels of ANC visit numbers. The findings  
280 from this study imply that the joint influence of household decision-making scores and ANC

281 visit numbers significantly strengthens their combined effect on child linear growth. In essence,  
282 the positive impact of household decision-making scores on linear growth is more pronounced  
283 when there are higher levels of ANC consultations.

284 This study has some limitations. First, the cross-sectional nature limits our ability to determine  
285 the causal-effect inference. Secondly, apart from anthropometric measurements, many of the  
286 variables evaluated were self-reported, which may have been subject to social desirability bias.  
287 Third, we did not measure other factors, such as nutrition biomarkers, that can affect linear  
288 growth as well.

289 In conclusion, the results from this study collectively elaborate the multifaceted nature of  
290 factors promoting child linear growth, including maternal implication in household decision-  
291 making, increased number of ANC consultations, and mother's income-generating. These  
292 results contribute valuable information for shaping interventions and policies aimed at  
293 improving child nutrition and growth in the studied community.

## 294 **References**

- 295 1. UNICEF/WHO/WORLD BANK. Levels and trends in child malnutrition: Key  
296 findings [Internet]. 2023. Available from: [data.unicef.org/nutrition](https://data.unicef.org/nutrition)
- 297 2. Motbainor A, Worku A, Kumie A. Stunting is associated with food diversity while  
298 wasting with food insecurity among under-five children in East and West Gojjam  
299 Zones of Amhara Region, Ethiopia. *PLoS One*. 2015;10(8):1–14.
- 300 3. NISR. Rwanda Demographic and Health Survey 2019-2020. Kigali; 2021.
- 301 4. de Onis M, Branca F. Childhood stunting: a global perspective. *Matern Child Nutr*  
302 [Internet]. 2016 May 17;12 Suppl 1(Suppl 1):12–26. Available from:  
303 <https://onlinelibrary.wiley.com/doi/10.1111/mcn.12231>
- 304 5. Leroy JL, Frongillo EA. Perspective: What Does Stunting Really Mean? A Critical  
305 Review of the Evidence. *Adv Nutr* [Internet]. 2019 Mar 1;10(2):196–204. Available  
306 from: <https://linkinghub.elsevier.com/retrieve/pii/S2161831322003982>
- 307 6. De Lucia Rolfe E, de França GVA, Vianna CA, Gigante DP, Miranda JJ, Yudkin JS,  
308 Horta BL, Ong KK. Associations of stunting in early childhood with cardiometabolic  
309 risk factors in adulthood. *Schooling CM*, editor. *PLoS One* [Internet]. 2018 Apr



- 310 11;13(4):e0192196. Available from: <https://dx.plos.org/10.1371/journal.pone.0192196>
- 311 7. Dewey KG, Begum K. Long-term consequences of stunting in early life. *Matern Child*  
312 *Nutr* [Internet]. 2011 Oct 19;7 Suppl 3(Suppl 3):5–18. Available from:  
313 <https://onlinelibrary.wiley.com/doi/10.1111/j.1740-8709.2011.00349.x>
- 314 8. Leroy JL, Ruel M, Habicht J, Frongillo E a. Linear Growth Deficit Continues to  
315 Accumulate beyond the First 1000 Days in Low- and Middle-Income Countries:  
316 Global Evidence from 51 National Surveys. *J Nutr* [Internet]. 2014 Sep;144(9):1460–  
317 6. Available from: <https://linkinghub.elsevier.com/retrieve/pii/S0022316622009890>
- 318 9. Reyes H, Pérez-Cuevas R, Sandoval A, Castillo R, Santos JI, Doubova S V, Gutiérrez  
319 G. The family as a determinant of stunting in children living in conditions of extreme  
320 poverty: a case-control study. *BMC Public Health* [Internet]. 2004 Nov 30 [cited 2015  
321 Jul 16];4(1):57. Available from: <http://www.biomedcentral.com/1471-2458/4/57>
- 322 10. Habimana S, Biracyaza E. Risk Factors Of Stunting Among Children Under 5 Years  
323 Of Age In The Eastern And Western Provinces Of Rwanda: Analysis Of Rwanda  
324 Demographic And Health Survey 2014/2015. *Pediatr Heal Med Ther* [Internet]. 2019  
325 Oct;10:115–30. Available from: [https://www.dovepress.com/risk-factors-of-stunting-](https://www.dovepress.com/risk-factors-of-stunting-among-children-under-5-years-of-age-in-the-ea-peer-reviewed-article-PHMT)  
326 [among-children-under-5-years-of-age-in-the-ea-peer-reviewed-article-PHMT](https://www.dovepress.com/risk-factors-of-stunting-among-children-under-5-years-of-age-in-the-ea-peer-reviewed-article-PHMT)
- 327 11. Unicef. Reducing Stunting in Children under Five years of age: A Comprehensive  
328 Evaluation of Unicef’s Strategies and Programme Performance: Rwanda Country Case  
329 Study. 2017.
- 330 12. Aguilera Vasquez N, Daher J. Do nutrition and cash-based interventions and policies  
331 aimed at reducing stunting have an impact on economic development of low-and-  
332 middle-income countries? A systematic review. *BMC Public Health* [Internet]. 2019  
333 Dec 30;19(1):1419. Available from:  
334 <https://bmcpublichealth.biomedcentral.com/articles/10.1186/s12889-019-7677-1>
- 335 13. NISR. Rwanda Demographic and Health Survey 2010. Kigali; 2010.
- 336 14. Ministry of Health/ Rwanda. Fourth Health Sector Strategic Plan July 2018- June-  
337 2024 [Internet]. 2018. Available from: [http://npngti.com/wp-](http://npngti.com/wp-content/uploads/2018/06/Rwanda_Nat-Health-Sector-Plan_2018-2024.pdf)  
338 [content/uploads/2018/06/Rwanda\\_Nat-Health-Sector-Plan\\_2018-2024.pdf](http://npngti.com/wp-content/uploads/2018/06/Rwanda_Nat-Health-Sector-Plan_2018-2024.pdf)
- 339 15. Government of Rwanda. Poverty Reduction Strategy Paper [Internet]. 2002. Available  
340 from: <http://www.imf.org/External/NP/prsp/2002/rwa/01/063102.pdf>
- 341 16. Fisher AA, Laing J, J S, Townsend JW. Handbook for Family Planning Operations  
342 Research Design. *Soc Sci Med*. 1991;39(2nd edition):381–90.
- 343 17. Cox JL, Holden JM, Sagovsky R. Detection of postnatal depression. Development of  
344 the 10-item Edinburgh Postnatal Depression Scale. *Br J Psychiatry* [Internet]. 1987 Jun  
345 2;150(6):782–6. Available from:  
346 [https://www.cambridge.org/core/product/identifier/S0007125000214712/type/journal\\_](https://www.cambridge.org/core/product/identifier/S0007125000214712/type/journal_article)  
347 [article](https://www.cambridge.org/core/product/identifier/S0007125000214712/type/journal_article)
- 348 18. Umuziga MP, Adejumo O, Hynie M. A cross-sectional study of the prevalence and  
349 factors associated with symptoms of perinatal depression and anxiety in Rwanda.  
350 *BMC Pregnancy Childbirth* [Internet]. 2020 Dec 31;20(1):68. Available from:  
351 <https://doi.org/10.1186/s12884-022-04522-4>
- 352 19. Mushi J, Uwayo F, Irakoze M, Nathan L, Rulisa S. Use of a Kinyarwanda-Based

- 353 Edinburgh Postpartum Depression Screen in a Maternity Ward of a Major Referral  
354 Hospital. In: American College of Obstetricians and Gynecologists. Wolters Kluwer  
355 Health, Inc; 2020. p. 2020.
- 356 20. C-CHANGE, FHI360, USAID. COMPENDIUM OF GENDER SCALES. 2011. 26 p.
- 357 21. Čížek P, Sadıkoğlu S. Robust nonparametric regression: A review. WIREs Comput  
358 Stat [Internet]. 2020 May 12;12(3):1–16. Available from:  
359 <https://wires.onlinelibrary.wiley.com/doi/10.1002/wics.1492>
- 360 22. Binagwaho A, Rukundo A, Powers S, Donahoe KB, Agbonyitor M, Ngabo F, Karema  
361 C, Scott KW, Smith Fawzi MC. Trends in burden and risk factors associated with  
362 childhood stunting in Rwanda from 2000 to 2015: policy and program implications.  
363 BMC Public Health [Internet]. 2020 Dec 20;20(1):83. Available from:  
364 <https://bmcpublichealth.biomedcentral.com/articles/10.1186/s12889-020-8164-4>
- 365 23. Rutayisire R, Kanazayire C, Tuyisenge G, Munyanshongore C. Trends in the  
366 Prevalence and Associated Contributing Factors of Stunting in Children Under Five  
367 Years of Age. Secondary Data Analysis of 2005, 2010, and 2014–2015 Rwanda  
368 Demographic and Health Surveys. Rwanda J Med Heal Sci [Internet]. 2020 Apr  
369 14;3(1):71–85. Available from:  
370 <https://www.ajol.info/index.php/rjmhs/article/view/194651>
- 371 24. Amugsi DA, Dimbuene ZT. Basic determinants of child linear growth outcomes in  
372 sub-Saharan Africa: a cross-sectional survey analysis of positive deviants in poor  
373 households. Sci Rep [Internet]. 2022 Aug 20;12(1):14218. Available from:  
374 <http://www.ncbi.nlm.nih.gov/pubmed/35987958>
- 375 25. Umuziga MP, Gishoma D, Hynie M, Nyirazinyoye L. Antenatal depressive symptoms  
376 in Rwanda: rates, risk factors, and social support. BMC Pregnancy Childbirth  
377 [Internet]. 2022 Mar 8;22(1):193. Available from:  
378 [https://bmcpregnancychildbirth.biomedcentral.com/articles/10.1186/s12884-020-2747-](https://bmcpregnancychildbirth.biomedcentral.com/articles/10.1186/s12884-020-2747-z)  
379 [z](https://doi.org/10.1186/s12884-020-2747-z)
- 380 26. Moore E V., Singh N, Serra R, McKune SL. Household decision-making, women’s  
381 empowerment, and increasing egg consumption in children under five in rural Burkina  
382 Faso: Observations from a cluster randomized controlled trial. Front Sustain Food Syst  
383 [Internet]. 2022 Oct 26;6. Available from:  
384 <https://www.frontiersin.org/articles/10.3389/fsufs.2022.1034618/full>
- 385 27. Tesfaye A, Egata G. Stunting and associated factors among children aged 6–59 months  
386 from productive safety net program beneficiary and non-beneficiary households in  
387 Meta District, East Hararghe zone, Eastern Ethiopia: a comparative cross-sectional  
388 study. J Heal Popul Nutr [Internet]. 2022;41(1):1–12. Available from:  
389 <https://doi.org/10.1186/s41043-022-00291-0>
- 390 28. Girma S, Alenko A. Women’s Involvement in Household Decision-Making and  
391 Nutrition Related-Knowledge as Predictors of Child Global Acute Malnutrition in  
392 Southwest Ethiopia: A Case–Control Study. Nutr Diet Suppl [Internet]. 2020  
393 Jun;Volume 12:87–95. Available from: [https://www.dovepress.com/womenrsquos-](https://www.dovepress.com/womenrsquos-involvement-in-household-decision-making-and-nutrition-rel-peer-reviewed-article-NDS)  
394 [involvement-in-household-decision-making-and-nutrition-rel-peer-reviewed-article-](https://www.dovepress.com/womenrsquos-involvement-in-household-decision-making-and-nutrition-rel-peer-reviewed-article-NDS)  
395 [NDS](https://www.dovepress.com/womenrsquos-involvement-in-household-decision-making-and-nutrition-rel-peer-reviewed-article-NDS)
- 396 29. Folayan MO, Oginni AB, El Tantawi M, Adeniyi A, Alade M, Finlayson TL.

- 397 Association between maternal decision-making and mental health and the nutritional  
398 status of children under 6 years of age in sub-urban Nigeria. *BMC Public Health*  
399 [Internet]. 2023 Jun 15;23(1):1159. Available from:  
400 <https://bmcpublikealth.biomedcentral.com/articles/10.1186/s12889-023-16055-2>
- 401 30. Harvey CM, Newell M-L, Padmadas S. Maternal socioeconomic status and infant  
402 feeding practices underlying pathways to child stunting in Cambodia: structural path  
403 analysis using cross-sectional population data. *BMJ Open* [Internet]. 2022 Nov  
404 3;12(11):e055853. Available from:  
405 <https://bmjopen.bmj.com/lookup/doi/10.1136/bmjopen-2021-055853>
- 406 31. Goto R, Devine J, Nicholas Mascie-Taylor CG, Ormand J, Jufry AJ. The impact of an  
407 income-generating activities programme on children and mothers' undernutrition in  
408 extreme poor rural Bangladeshi households. *Public Health Nutr* [Internet]. 2019 Nov  
409 12;22(16):3073–82. Available from:  
410 [https://www.cambridge.org/core/product/identifier/S1368980019002015/type/journal\\_](https://www.cambridge.org/core/product/identifier/S1368980019002015/type/journal_article)  
411 [article](https://www.cambridge.org/core/product/identifier/S1368980019002015/type/journal_article)
- 412 32. Haque MA, Choudhury N, Wahid BZ, Ahmed ST, Farzana FD, Ali M, Naz F,  
413 Siddiqua TJ, Rahman SS, Faruque A, Ahmed T. A predictive modelling approach to  
414 illustrate factors correlating with stunting among children aged 12-23 months: a cluster  
415 randomised pre-post study. *BMJ Open* [Internet]. 2023 Apr 26;13(4):e067961.  
416 Available from: <https://bmjopen.bmj.com/lookup/doi/10.1136/bmjopen-2022-067961>
- 417 33. Musheiguza E, Mbegalo T, Mbukwa JN. Bayesian multilevel modelling of the  
418 association between socio-economic status and stunting among under-five-year  
419 children in Tanzania. *J Heal Popul Nutr* [Internet]. 2023;42(1):1–15. Available from:  
420 <https://doi.org/10.1186/s41043-023-00474-3>
- 421 34. Ding X, Li J, Zhao L, Yang Z, Zhao W. Long maternal working hours were linked to  
422 obesity, underweight and stunting in children under age 5 in China. *Int J Soc Welf*  
423 [Internet]. 2023 Jul 22;32(3):320–33. Available from:  
424 <https://onlinelibrary.wiley.com/doi/10.1111/ijsw.12600>  
425
